# Supplementary material for: Hypoxia Potentiates the Radiation-Sensitizing Effect of Olaparib in Human Non-Small Cell Lung Cancer Xenografts by Contextual Synthetic Lethality
Source: PubMed Central journal article supplement (PMC4856738; doi:10.1016/j.ijrobp.2016.01.035), 2016-06-01
Supplement: mmc1.pdf [file mmc1.pdf]

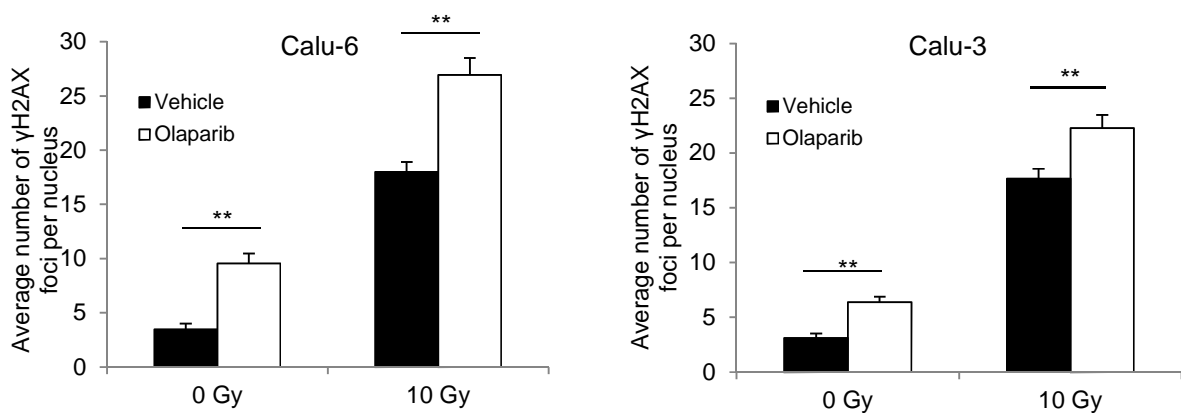

**Supplementary Fig. S1** immunofluorescence staining of  $\gamma$ H2AX foci in NSCLC cell lines. Calu-6 and Calu-3 cells were incubated with olaparib or vehicle starting 1 h before radiation (0 or 10 Gy). Cells were fixed 24 h post-radiation for  $\gamma$ H2AX immunofluorescence staining. The average numbers of  $\gamma$ H2AX foci per nucleus were quantified. Data were represented as means  $\pm$  SEM from three independent experiments. \*\* $P < 0.01$ .
