# Supplementary material for: Hypoxia Potentiates the Radiation-Sensitizing Effect of Olaparib in Human Non-Small Cell Lung Cancer Xenografts by Contextual Synthetic Lethality
Source: PubMed Central journal article supplement (PMC4856738; doi:10.1016/j.ijrobp.2016.01.035), 2016-06-01
Supplement: mmc2.pdf [file mmc2.pdf]

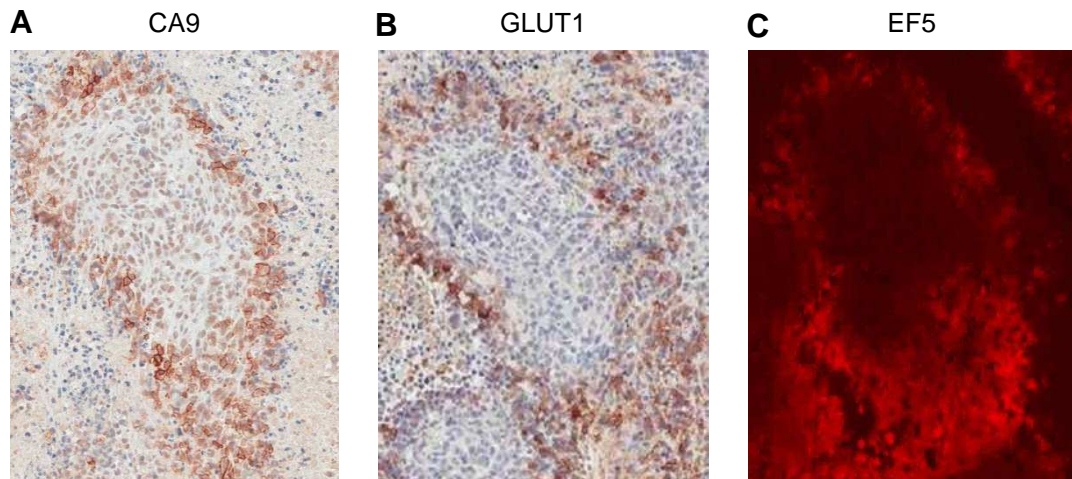

**Supplementary Fig. S2** Immunohistological detection of tumor hypoxia. Mice bearing Calu-6 xenografts were intraperitoneally injected with EF5 2 h prior to sacrifice. Tumors were then collected and cut into serial sections for IHC. (A) Stained with anti-CA9 antibody (brown). (B) Stained with anti-GLUT1 antibody (brown). (C) Stained with Cy3-labeled anti-EF5 antibody (red).
