# Supplementary material for: Hypoxia Potentiates the Radiation-Sensitizing Effect of Olaparib in Human Non-Small Cell Lung Cancer Xenografts by Contextual Synthetic Lethality
Source: PubMed Central journal article supplement (PMC4856738; doi:10.1016/j.ijrobp.2016.01.035), 2016-06-01
Supplement: mmc3.pdf [file mmc3.pdf]

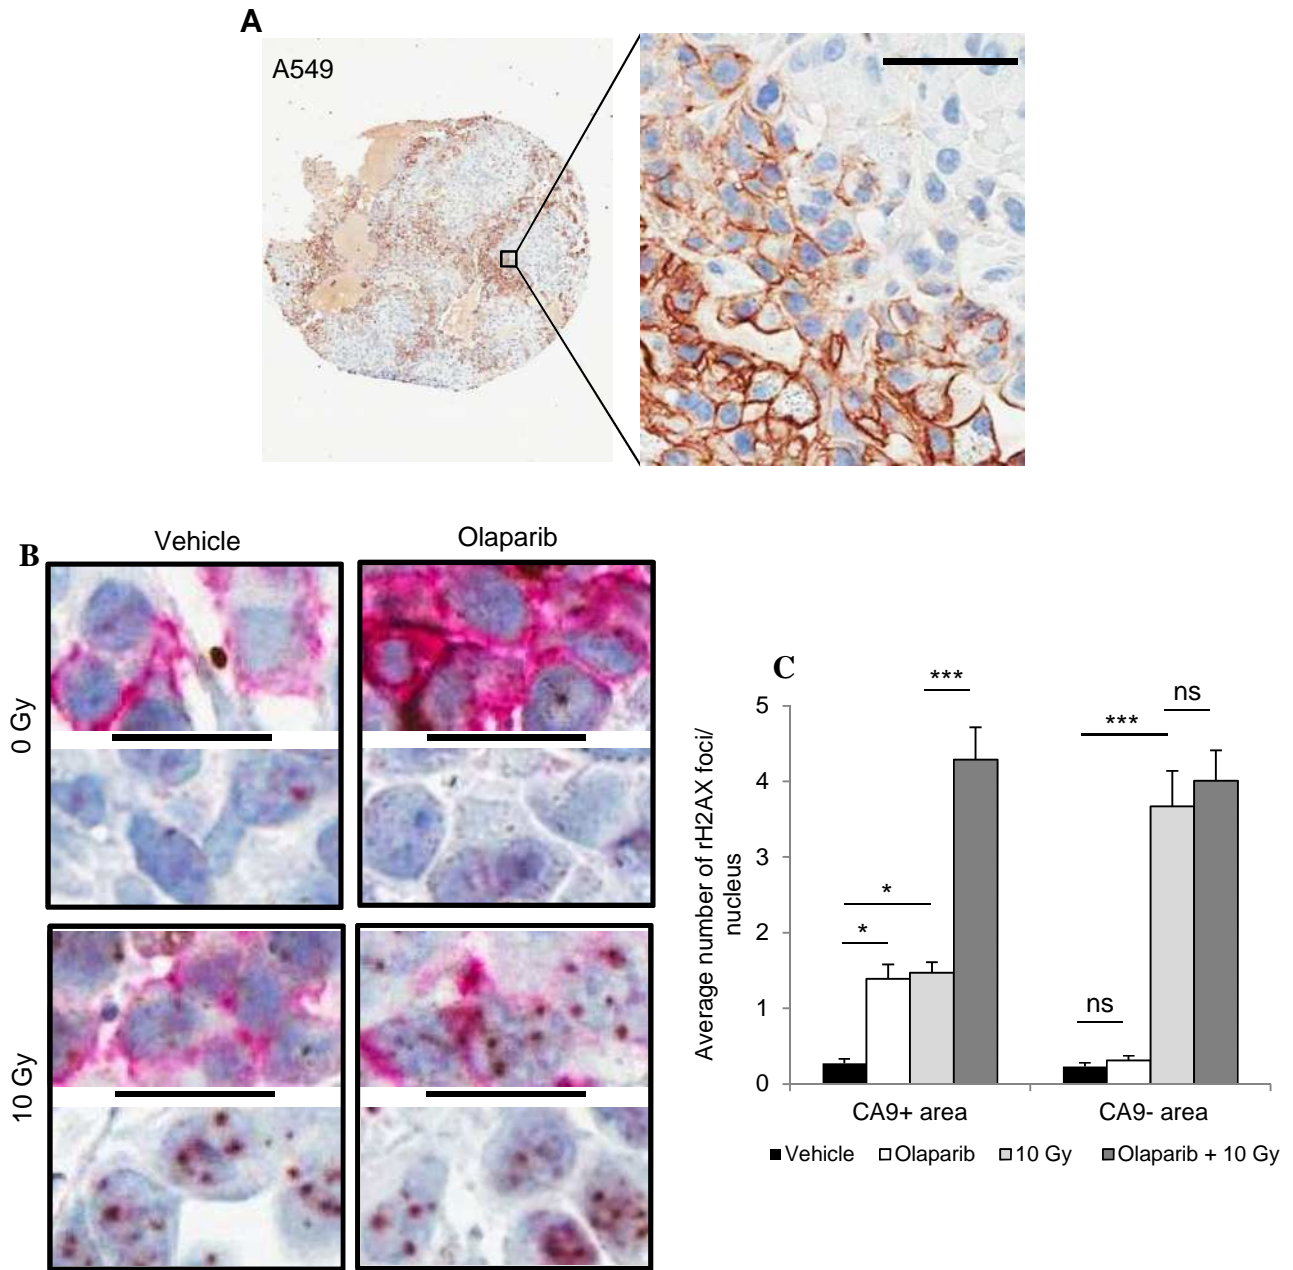

**Supplementary Fig. S3.** Olaparib increases residual DNA DSBs in hypoxic tumor cells of A549 xenografts following radiation. Mice bearing established A549 xenografts (100 mm<sup>3</sup>) were treated with olaparib or vehicle 30 min prior to 0 Gy or 10 Gy radiation. Tumors were collected 24 h post-radiation for CA9 and  $\gamma$ H2AX IHC staining. (A) Representative CA9 staining in A549 tumors. Scale bar, 50  $\mu$ m. (B) Representative  $\gamma$ H2AX (brown)/ CA9 (red) staining. Scale bars, 20  $\mu$ m. (C) Quantitative analysis of the average  $\gamma$ H2AX foci per nucleus in CA9 positive and negative tumor subregions (mean  $\pm$  SEM). ns: not significant, \* $P$ <0.05, \*\*\* $P$ <0.001.
