# Supplementary material for: Hypoxia Potentiates the Radiation-Sensitizing Effect of Olaparib in Human Non-Small Cell Lung Cancer Xenografts by Contextual Synthetic Lethality
Source: PubMed Central journal article supplement (PMC4856738; doi:10.1016/j.ijrobp.2016.01.035), 2016-06-01
Supplement: mmc4.pdf [file mmc4.pdf]

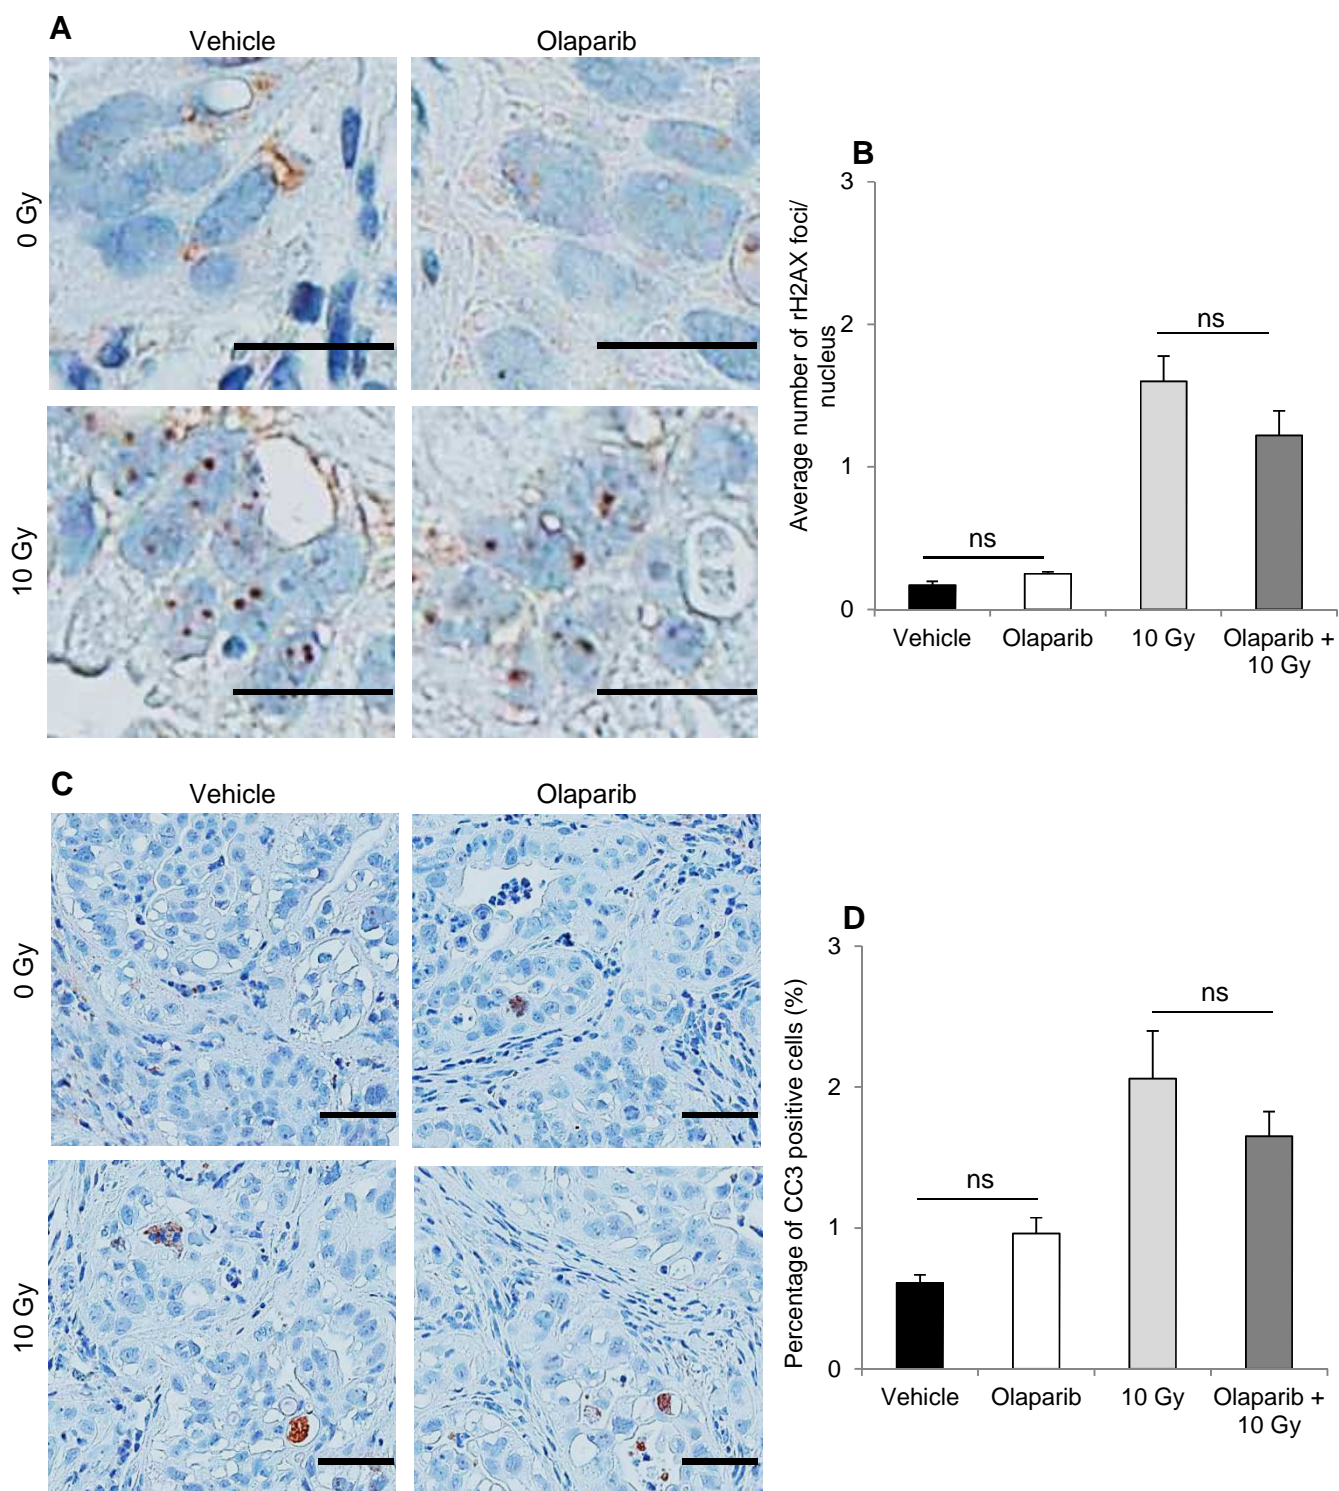

**Supplementary Fig. S4** Olaparib does not affect radiation-induced DNA damage repair and apoptosis in Calu-3 xenografts. Mice bearing Calu-3 xenografts were treated with olaparib or vehicle 30 min prior to 0 Gy or 10 Gy radiation. Tumors were collected 24 h or 72 h post-radiation for  $\gamma$ H2AX or CC3 IHC staining. (A) Representative  $\gamma$ H2AX staining at 24 h time point. Scale bars, 20  $\mu$ m. (B) Quantitative analysis of average  $\gamma$ H2AX foci per nucleus in Calu-3 tumors (mean  $\pm$  SEM). (C) Representative CC3 staining at 72 h time point. Scale bars, 50  $\mu$ m. (D) Quantitative analysis of the percentage of CC3 positive cells in Calu-3 tumors (mean  $\pm$  SEM). ns: not significant.
